# Supplementary material for: Investigation into the physical stability of a eugenol nanoemulsion in the presence of a high content of triglyceride
Source: Royal Society of Chemistry journal article supplement (doi:10.1039/c6ra16270c), 2016-01-01
Supplement: c6ra16270c1.pdf [file c6ra16270c1.pdf]

1

2

3

A

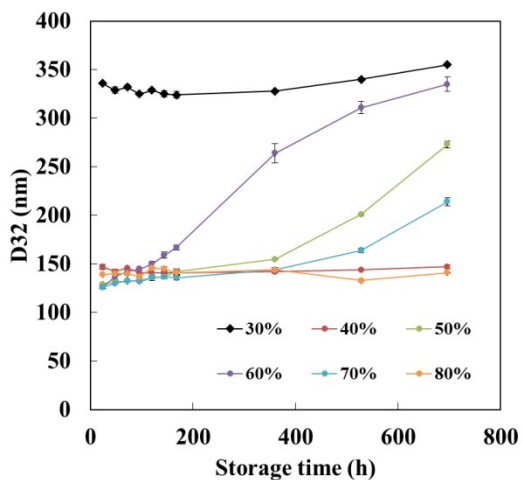

4

5

B

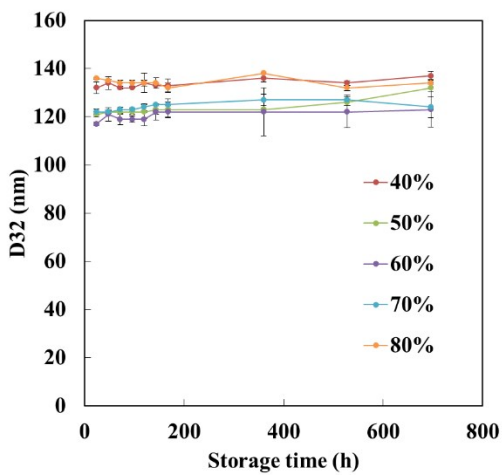

6

7 **Fig. 1** Particle size of eugenol emulsion particle in the presence of different triglyceride  
8 contents (A) BO and (B) MCT during storage determined by laser diffraction scattering.

9

10

11

12

13

14

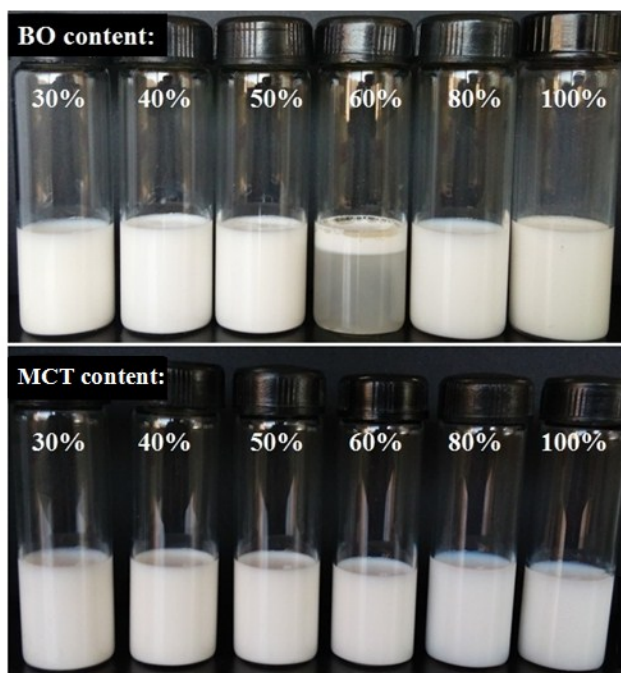

15

16 **Fig. 2S** Visual images of eugenol emulsion after 5-month storage at 4 °C.

17

18

19
